# Supplementary material for: Interactive analysis of biosurfactants in fruit-waste fermentation samples using BioSurfDB and MEGAN
Source: PubMed Central journal article supplement (PMC9095615; doi:10.1038/s41598-022-11753-0), 2022-05-11
Supplement: 41598_2022_11753_MOESM1_ESM.pdf [file 41598_2022_11753_MOESM1_ESM.pdf]

Supplementary Data

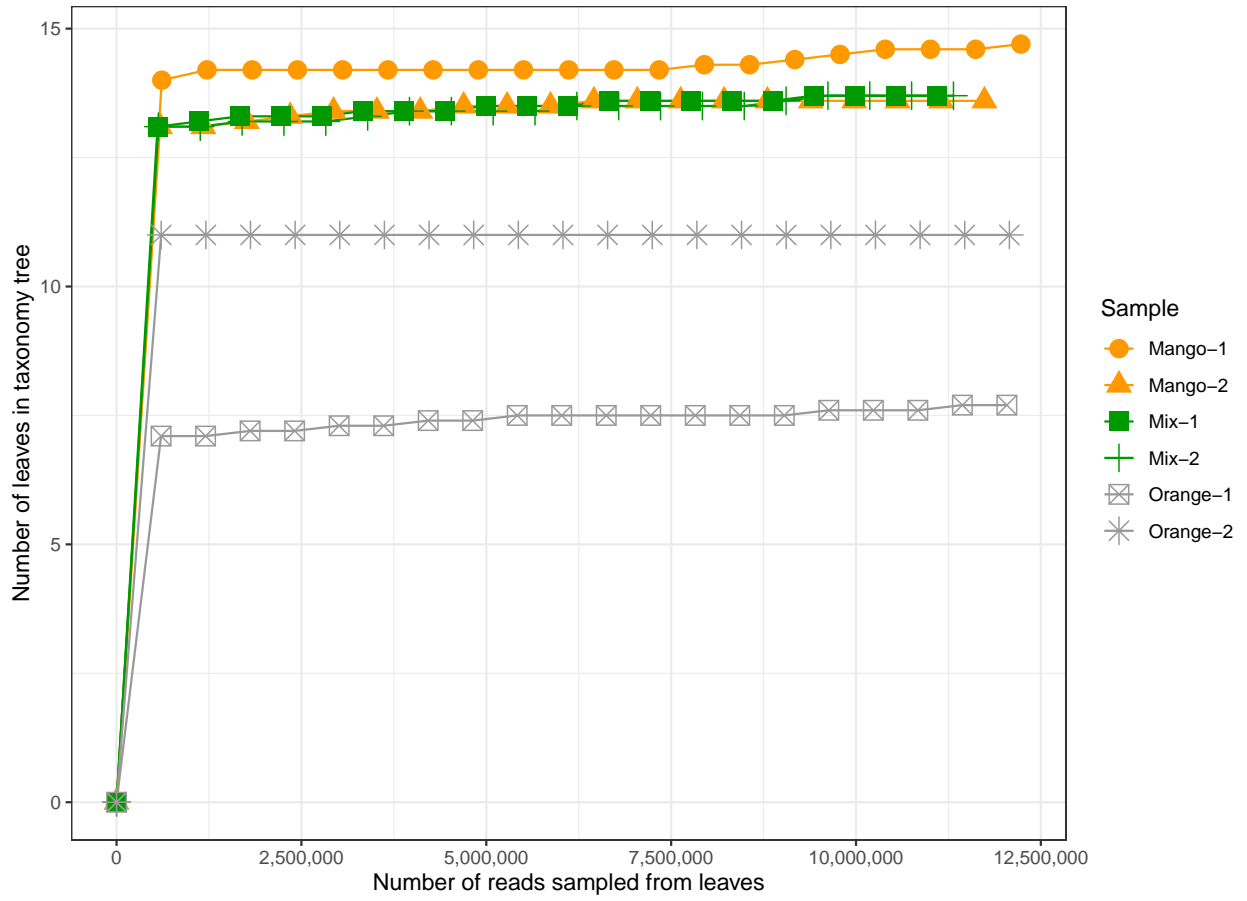

Figure S1: Rarefaction curves for six metagenome sequence data showing genera diversity as a function of number of reads.

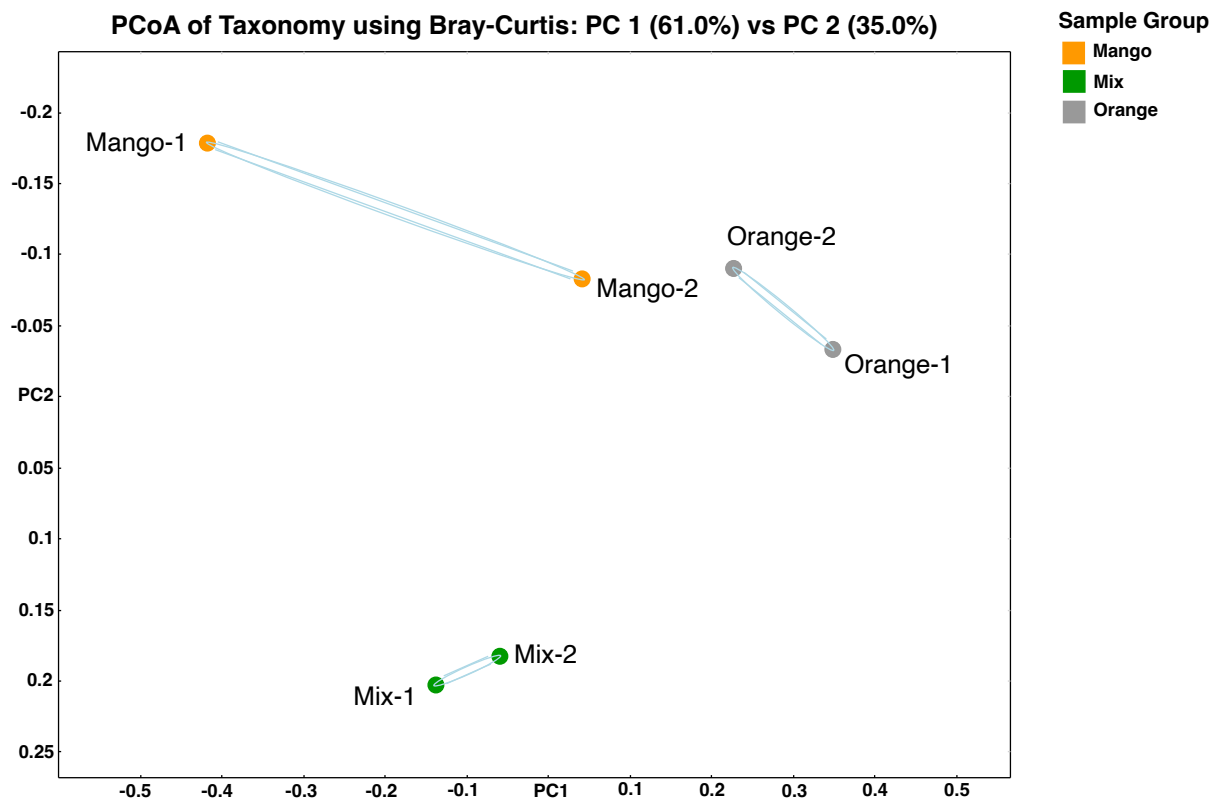

Figure S2: Analysis of  $\beta$ -diversity for six metagenome sequence dataset. Bray-Curtis distances were calculated from normalized genus-level counts and subjected to a principal coordinates analysis (PCoA). Here we plot the two first principal coordinates.

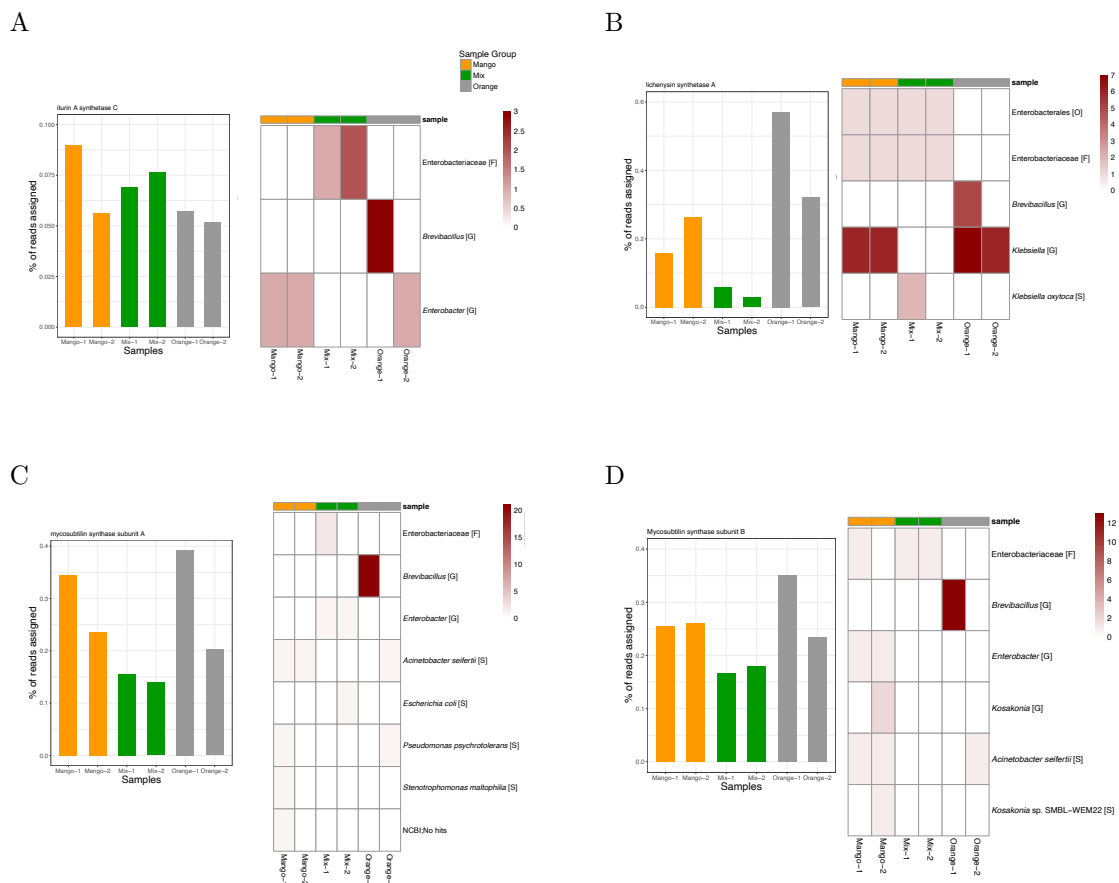

Figure S3: For one gene involved in iturin A biosynthesis, one in lichenysin biosynthesis and two in mycosubtilin biosynthesis, under (A)-(D), respectively, we report the percentage of reads assigned to the gene, and also show a heatmap indicating how many contigs obtained by gene-centric assembly were assigned to certain taxa, based on their alignment against the NCBI-nt database.

Table S1: Basic statistics for the gene-centric assembly of surfactant-related genes. For each of six genes associated with the class Putisolvins Biosynthesis, we report the number of contigs, their minimum, mean and maximum length and their average coverage, based on the separate assembly of all six samples.

| Gene name                                    | Number of contigs | Min. | Mean Length | Max. | Average coverage |
|----------------------------------------------|-------------------|------|-------------|------|------------------|
| <b>Mango-2</b>                               |                   |      |             |      |                  |
| Heat-shock protein                           | 68                | 201  | 561.2       | 1110 | 6.5              |
| Membrane fusion protein                      | 21                | 216  | 264.1       | 321  | 5.1              |
| Molecular chaperone                          | 32                | 207  | 359.4       | 528  | 6.7              |
| Outer membrane protein                       | 19                | 204  | 258.9       | 519  | 6.2              |
| Putisolvin related integral membrane protein | 78                | 201  | 387.3       | 777  | 5.9              |
| Putisolvin synthetase                        | 5                 | 210  | 276.6       | 333  | 3.8              |
| <b>Mix-1</b>                                 |                   |      |             |      |                  |
| Heat-shock protein                           | 43                | 201  | 518.7       | 1137 | 8.1              |
| Membrane fusion protein                      | 16                | 201  | 260.2       | 318  | 6.4              |
| Molecular chaperone                          | 18                | 219  | 347.7       | 522  | 8.9              |
| Outer membrane protein                       | 8                 | 234  | 250.9       | 264  | 7                |
| Putisolvin related integral membrane protein | 53                | 201  | 369.2       | 783  | 6.7              |
| Putisolvin synthetase                        | 1                 | 309  | 309         | 309  | 3.8              |
| <b>Mix-2</b>                                 |                   |      |             |      |                  |
| Heat-shock protein                           | 36                | 201  | 505.2       | 1125 | 8.4              |
| Membrane fusion protein                      | 10                | 225  | 269.4       | 318  | 6.7              |
| Molecular chaperone                          | 15                | 204  | 368.4       | 528  | 9.2              |
| Outer membrane protein                       | 9                 | 210  | 241         | 264  | 6.4              |
| Putisolvin related integral membrane protein | 51                | 201  | 370.1       | 777  | 6.2              |
| Putisolvin synthetase                        | 1                 | 333  | 333         | 333  | 4.4              |
| <b>Orange-1</b>                              |                   |      |             |      |                  |
| Heat-shock protein                           | 39                | 204  | 596.2       | 1155 | 7                |
| Membrane fusion protein                      | 13                | 225  | 269.5       | 321  | 5.3              |
| Molecular chaperone                          | 20                | 237  | 360.4       | 528  | 7.2              |
| Outer membrane protein                       | 16                | 201  | 232.5       | 264  | 6.3              |
| Putisolvin related integral membrane protein | 57                | 201  | 360.5       | 777  | 5.4              |
| Putisolvin synthetase                        | 3                 | 213  | 258         | 333  | 3.4              |
| <b>Orange-2</b>                              |                   |      |             |      |                  |
| Heat-shock protein                           | 61                | 201  | 564.6       | 1137 | 6.6              |
| Membrane fusion protein                      | 21                | 216  | 259.1       | 327  | 5.2              |
| Molecular chaperone                          | 26                | 225  | 376.7       | 528  | 7.2              |
| Outer membrane protein                       | 22                | 204  | 255.4       | 519  | 5.5              |
| Putisolvin related integral membrane protein | 65                | 201  | 408         | 777  | 5.8              |
| Putisolvin synthetase                        | 3                 | 207  | 270         | 333  | 4.1              |

Table S2: Basic statistics for the gene-centric assembly of surfactant-related genes. For one gene involved in iturin A biosynthesis, one in lichenysin biosynthesis and two in mycosubtilin biosynthesis, we report the number of contigs, their minimum, mean and maximum length and their average coverage, based on the separate assembly of all six samples.

| Gene name                       | Number of contigs | Min. | Mean Length | Max. | Average coverage |
|---------------------------------|-------------------|------|-------------|------|------------------|
| <b>Mango-1</b>                  |                   |      |             |      |                  |
| Iturin A synthetase C           | 1                 | 213  | 213         | 213  | 4.9              |
| Lichenysin synthetase A         | 8                 | 246  | 310.1       | 429  | 7.3              |
| mycosubtilin synthase subunit A | 4                 | 201  | 268.5       | 450  | 5.9              |
| Mycosubtilin synthase subunit B | 3                 | 201  | 242         | 309  | 4.1              |
| <b>Mango-2</b>                  |                   |      |             |      |                  |
| Iturin A synthetase C           | 1                 | 207  | 207         | 207  | 4.3              |
| Lichenysin synthetase A         | 8                 | 246  | 325.1       | 438  | 9.1              |
| mycosubtilin synthase subunit A | 1                 | 450  | 450         | 450  | 6.9              |
| Mycosubtilin synthase subunit B | 5                 | 216  | 262.8       | 345  | 4.2              |
| <b>Mix-1</b>                    |                   |      |             |      |                  |
| Iturin A synthetase C           | 1                 | 216  | 216         | 216  | 7.6              |
| Lichenysin synthetase A         | 4                 | 315  | 326.2       | 336  | 5.8              |
| mycosubtilin synthase subunit A | 3                 | 204  | 225         | 258  | 3.3              |
| Mycosubtilin synthase subunit B | 1                 | 216  | 216         | 216  | 4.7              |
| <b>Mix-2</b>                    |                   |      |             |      |                  |
| Iturin A synthetase C           | 2                 | 216  | 216         | 216  | 7.2              |
| Lichenysin synthetase A         | 2                 | 318  | 327         | 336  | 5.9              |
| mycosubtilin synthase subunit A | 2                 | 204  | 208.5       | 213  | 3.5              |
| Mycosubtilin synthase subunit B | 1                 | 216  | 216         | 216  | 6.9              |
| <b>Orange-1</b>                 |                   |      |             |      |                  |
| Iturin A synthetase C           | 3                 | 204  | 207         | 213  | 2.6              |
| Lichenysin synthetase A         | 12                | 219  | 306         | 444  | 6.4              |
| mycosubtilin synthase subunit A | 21                | 204  | 780.4       | 2820 | 3.3              |
| Mycosubtilin synthase subunit B | 13                | 201  | 250.2       | 276  | 3                |
| <b>Orange-2</b>                 |                   |      |             |      |                  |
| Iturin A synthetase C           | 1                 | 207  | 207         | 207  | 2.1              |
| Lichenysin synthetase A         | 6                 | 246  | 315         | 444  | 9.4              |
| mycosubtilin synthase subunit A | 2                 | 204  | 327         | 450  | 5                |
| Mycosubtilin synthase subunit B | 1                 | 306  | 306         | 306  | 4.3              |
